# Supplementary material for: Mucin-1 is required for Coxsackie Virus B3-induced inflammation in pancreatitis
Source: PubMed Central journal article supplement (PMC6650496; doi:10.1038/s41598-019-46933-y), 2019-07-23
Supplement: 41598_2019_46933_MOESM1_ESM.pdf [file 41598_2019_46933_MOESM1_ESM.pdf]

# Supplementary information for

## **Mucin-1 is required for Coxsackie Virus B3-induced inflammation in pancreatitis**

Xiang Liu<sup>1\*</sup>, Dahn L. Clemens<sup>2</sup>, James A. Grunkemeyer<sup>3</sup>, Jeffrey D. Price<sup>1</sup>, Kelly O'Connell<sup>4</sup>, Nora M. Chapman<sup>5</sup>, Peter Storz<sup>6</sup>, Haitao Wen<sup>7</sup>, Jesse L. Cox<sup>5</sup>, Whitney L. Reid<sup>5</sup>, Michael A. Hollingsworth<sup>4</sup>, and Sarah Thayer<sup>1</sup>

<sup>1</sup> Division of Surgical Oncology, Department of Surgery, Fred and Pamela Buffet Cancer Center, University of Nebraska Medical Center, Omaha, NE, USA;

<sup>2</sup> Department of Internal Medicine, Division of Gastroenterology and Hepatology; University of Nebraska Medical Center, Omaha, NE, USA;

<sup>3</sup> Midwest laboratories, Omaha, NE, University of Nebraska Medical Center, Omaha, NE, USA;

<sup>4</sup> Eppley Institute for Research in Cancer and Allied Diseases, Fred & Pamela Buffett Cancer Center, University of Nebraska Medical Center, Omaha, NE, USA;

<sup>5</sup> Department of Pathology and Microbiology, University of Nebraska Medical Center, Omaha, NE, USA;

<sup>6</sup> Department of Cancer Biology, Mayo Clinic, Jacksonville, FL 32224, USA.

<sup>7</sup> Department of Microbial Infection and Immunity, Infectious Disease Institute, The Ohio State University Comprehensive Cancer Center, The Ohio State University, Columbus, OH 43210, USA

\* Correspondence to [xli1@unmc.edu](mailto:xli1@unmc.edu)

Supplementary Figure 1.

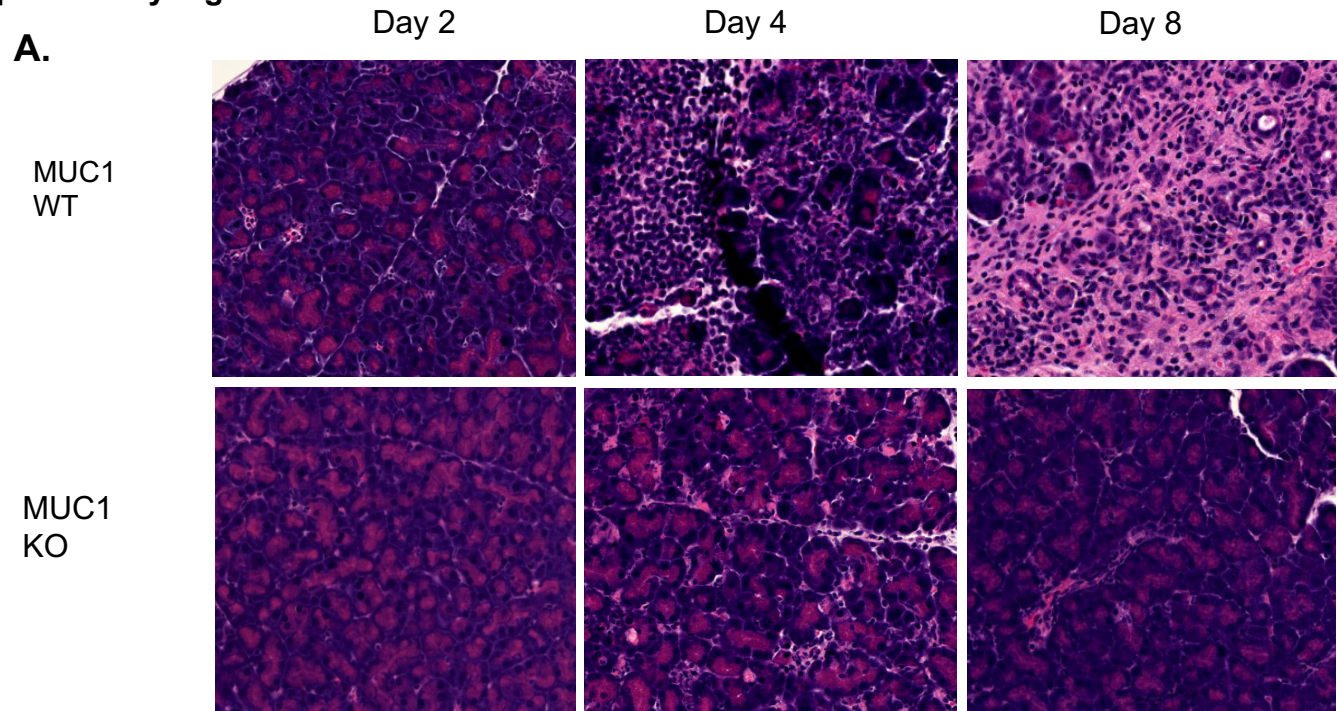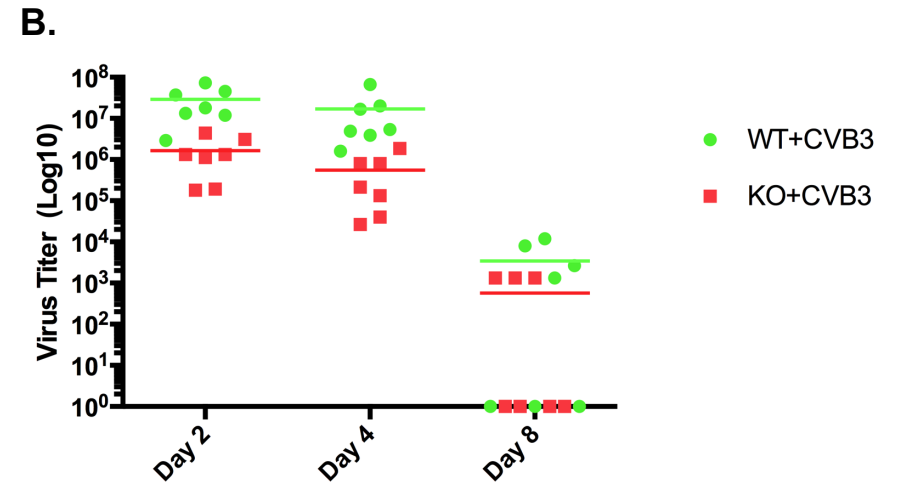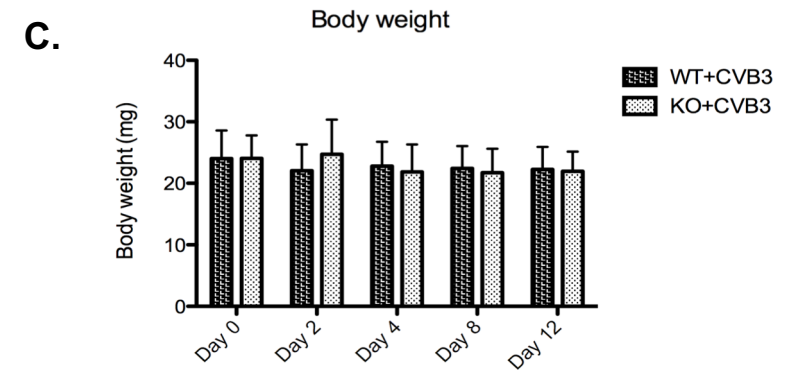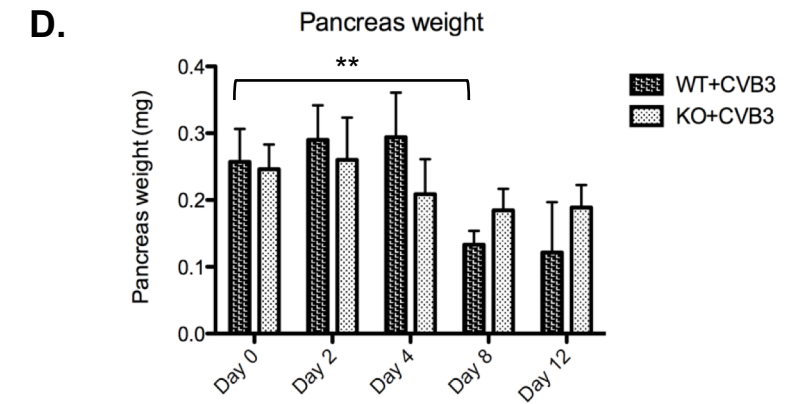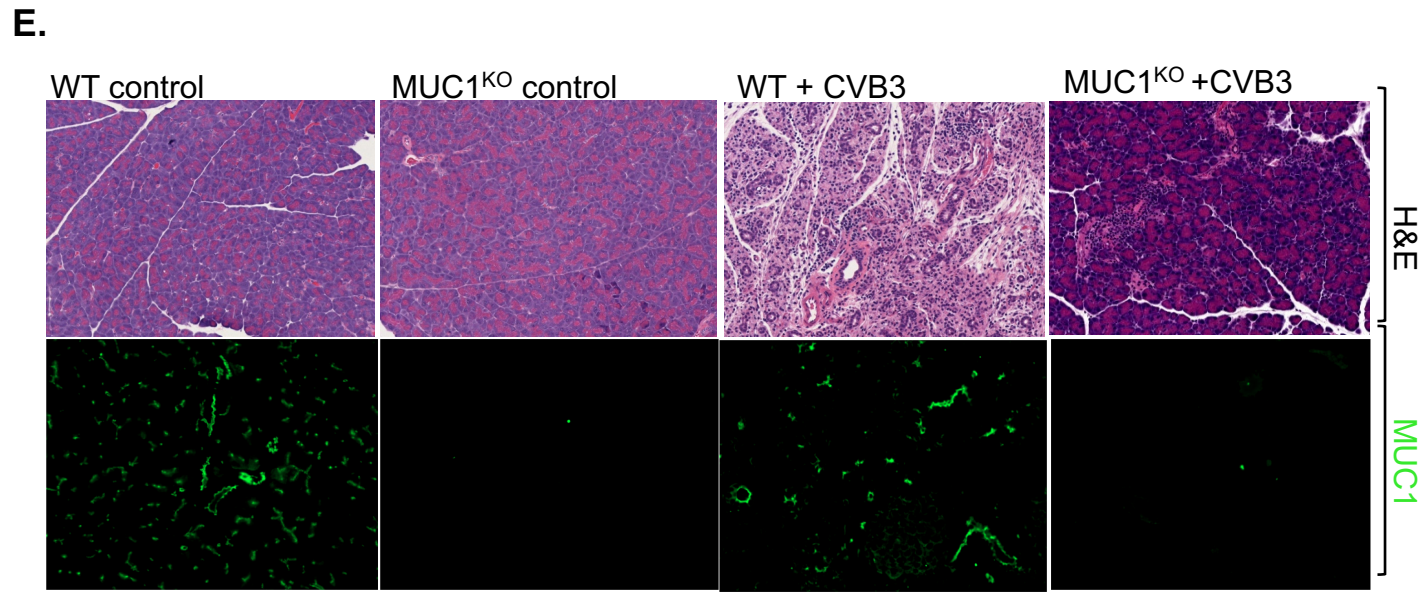

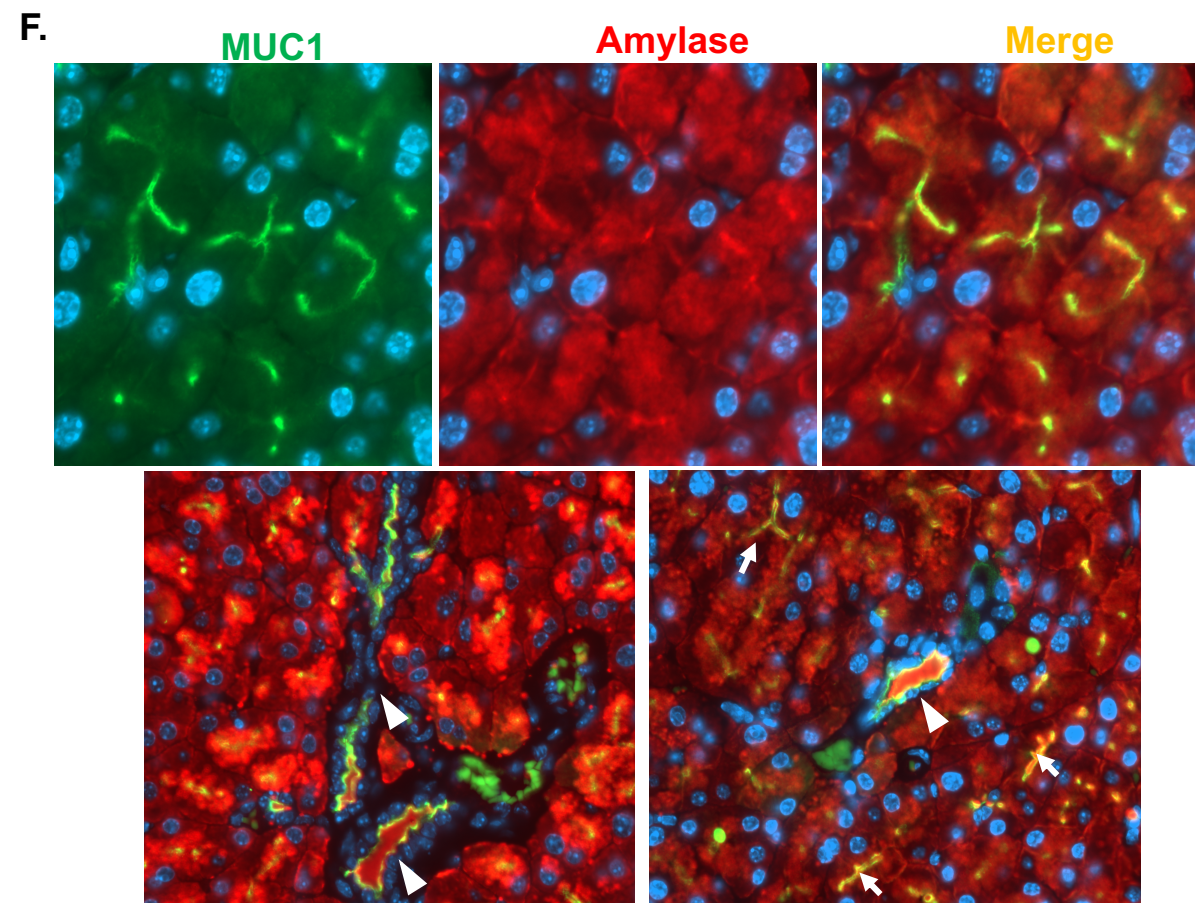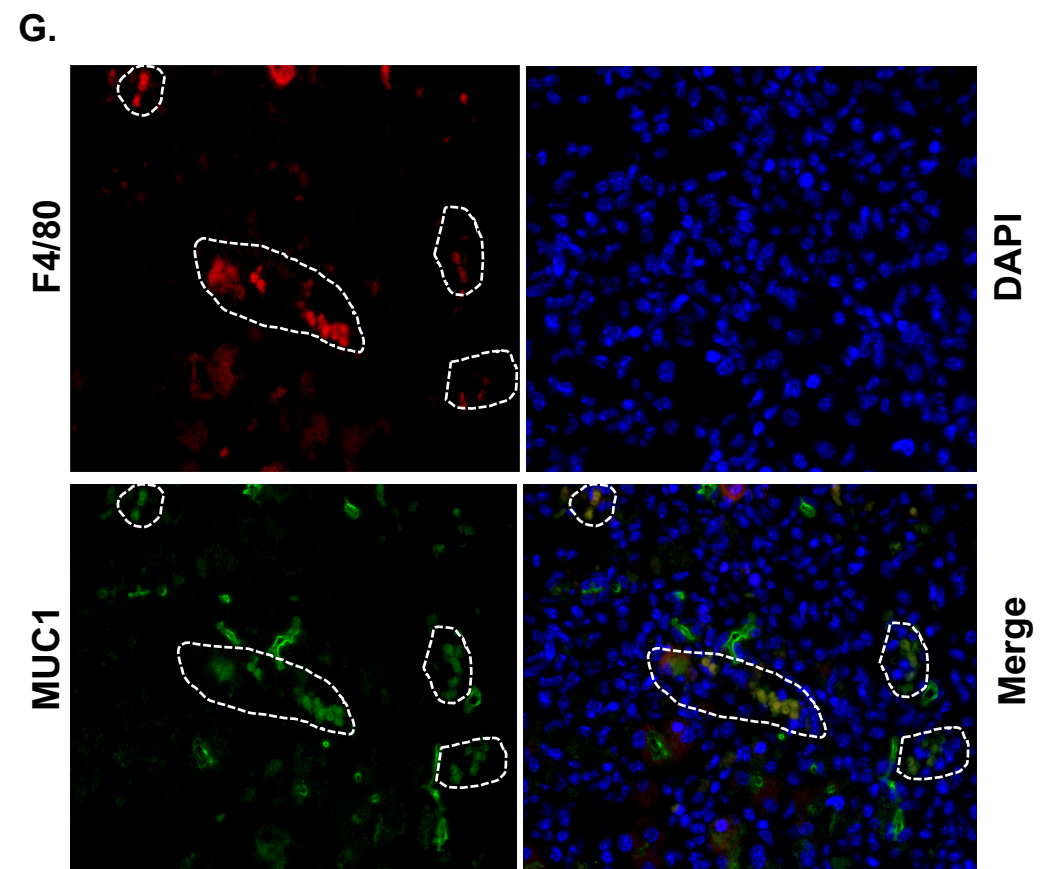

**Supplementary Figure 1.** Analysis of inflammation, body weight and pancreas weight in CVB3 infected WT and Muc1<sup>KO</sup> mice. **(A)** Representative H&E-stained sections of pancreas from control mice and Muc1<sup>KO</sup> mice inoculated with higher dose of virus (10e7 pfu) for 2, 4, 8 days. **(B)** Virus titer from spleens following virus infection at each time point was analyzed by plaque assay. Statistical analysis of Muc1<sup>WT</sup> and Muc1<sup>KO</sup> mice body weight **(C)** and pancreas weight **(D)** of WT and Muc1<sup>KO</sup> mice was assessed during the course of infection at day 0, 2, 4, 8 and 12. \*\*  $p \leq 0.01$  indicates statistical significance. **(E)** Pancreas from WT control, Muc1<sup>KO</sup> with no CVB3, WT+CVB3 and Muc1<sup>KO</sup>+CVB3 were subjected to H&E staining and immunofluorescence staining for Muc1. **(F)** Immunofluorescence pictures of MUC1 staining in wildtype mice pancreas. Green indicates MUC1 staining. Red indicates amylase staining. Arrow shows intercalated duct. Arrow heads points to intralobular duct. **(G)** MUC1 expression in macrophages. Red indicates F4/80 staining for macrophages. Green indicates MUC1 staining.

Supplementary Figure 2.

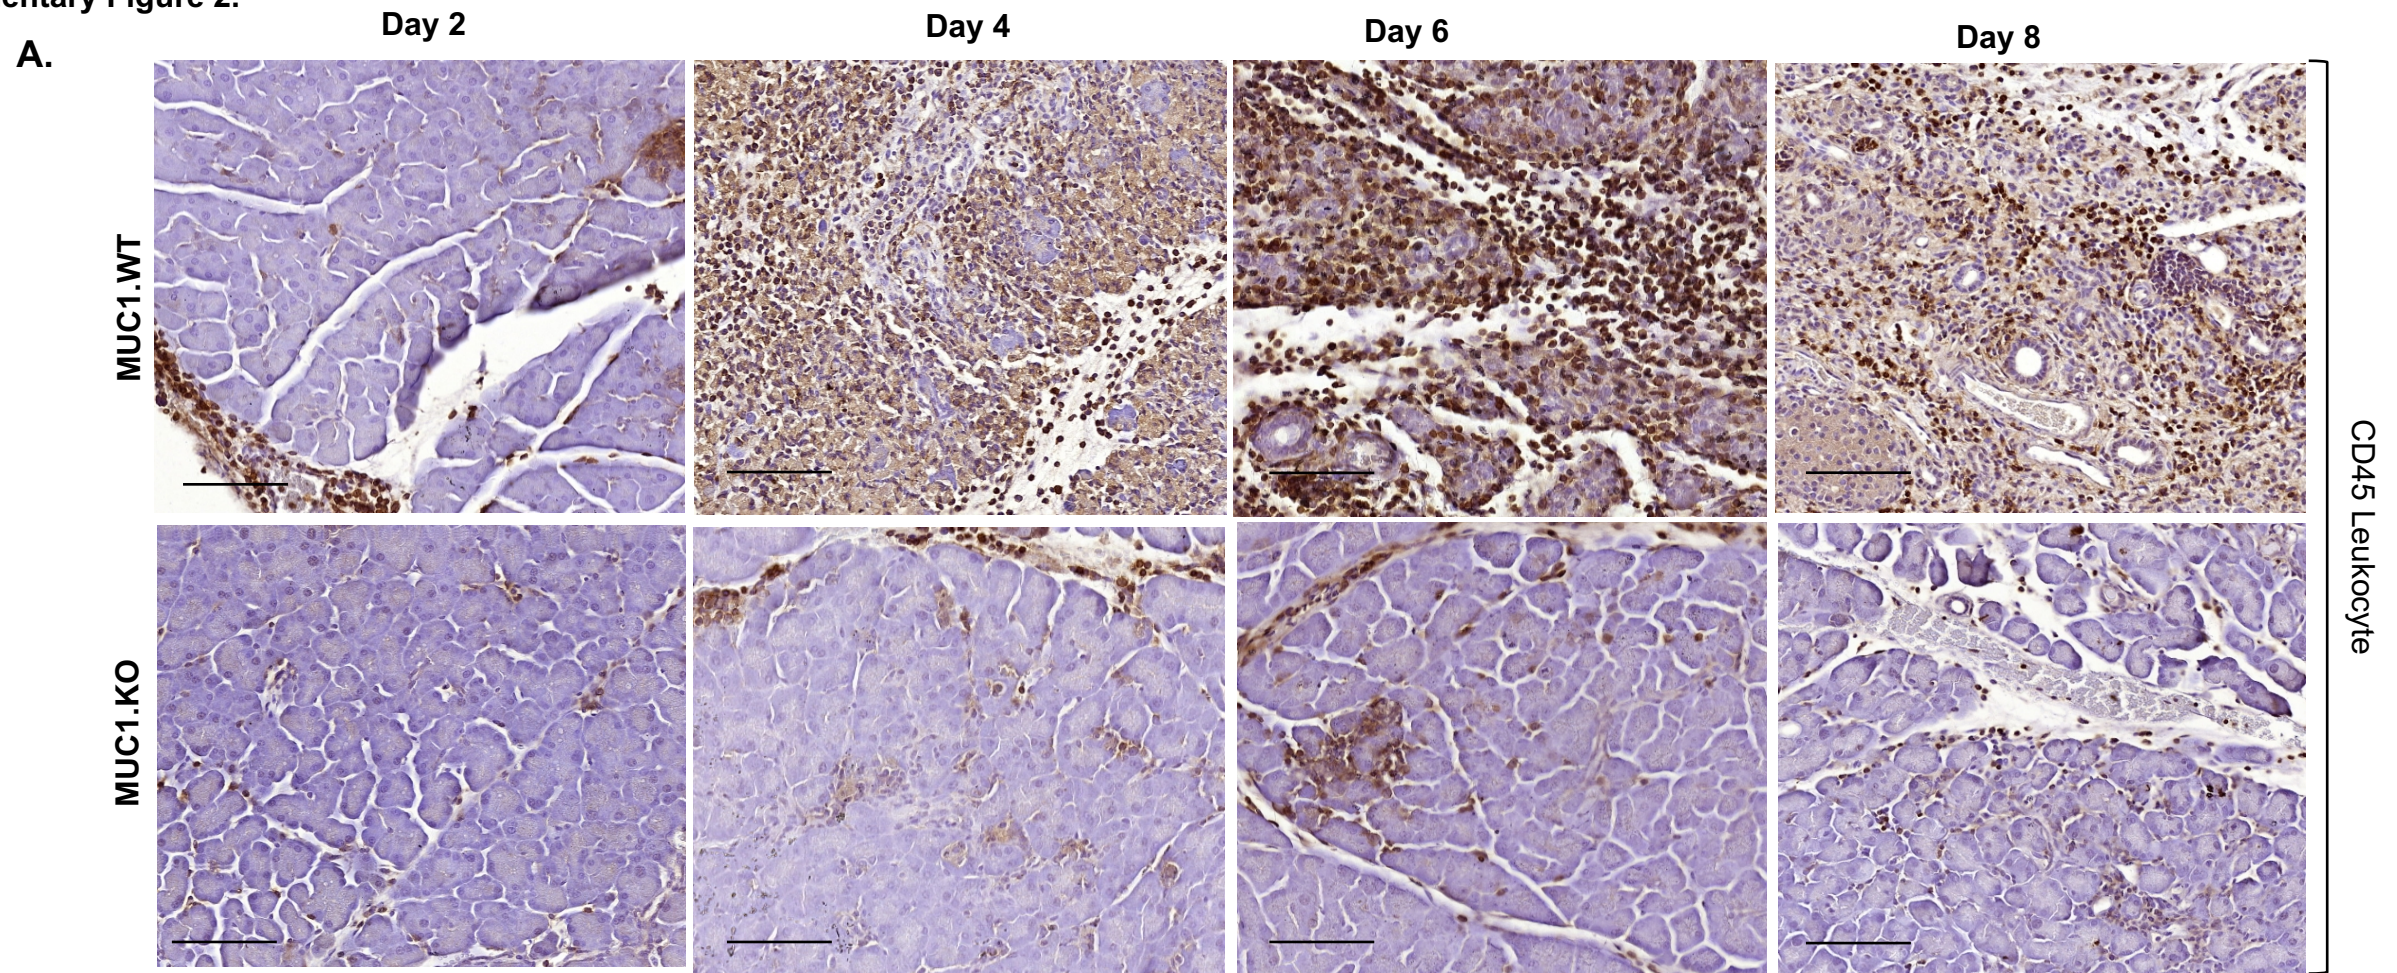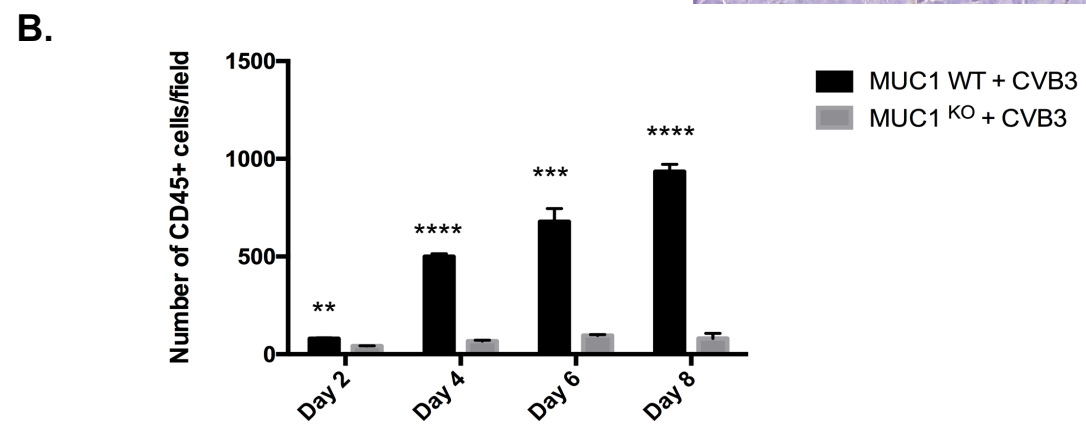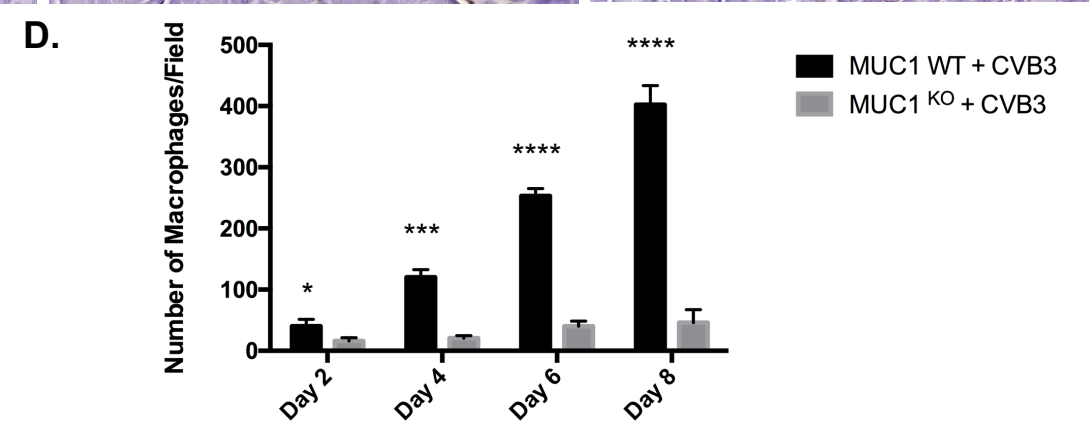

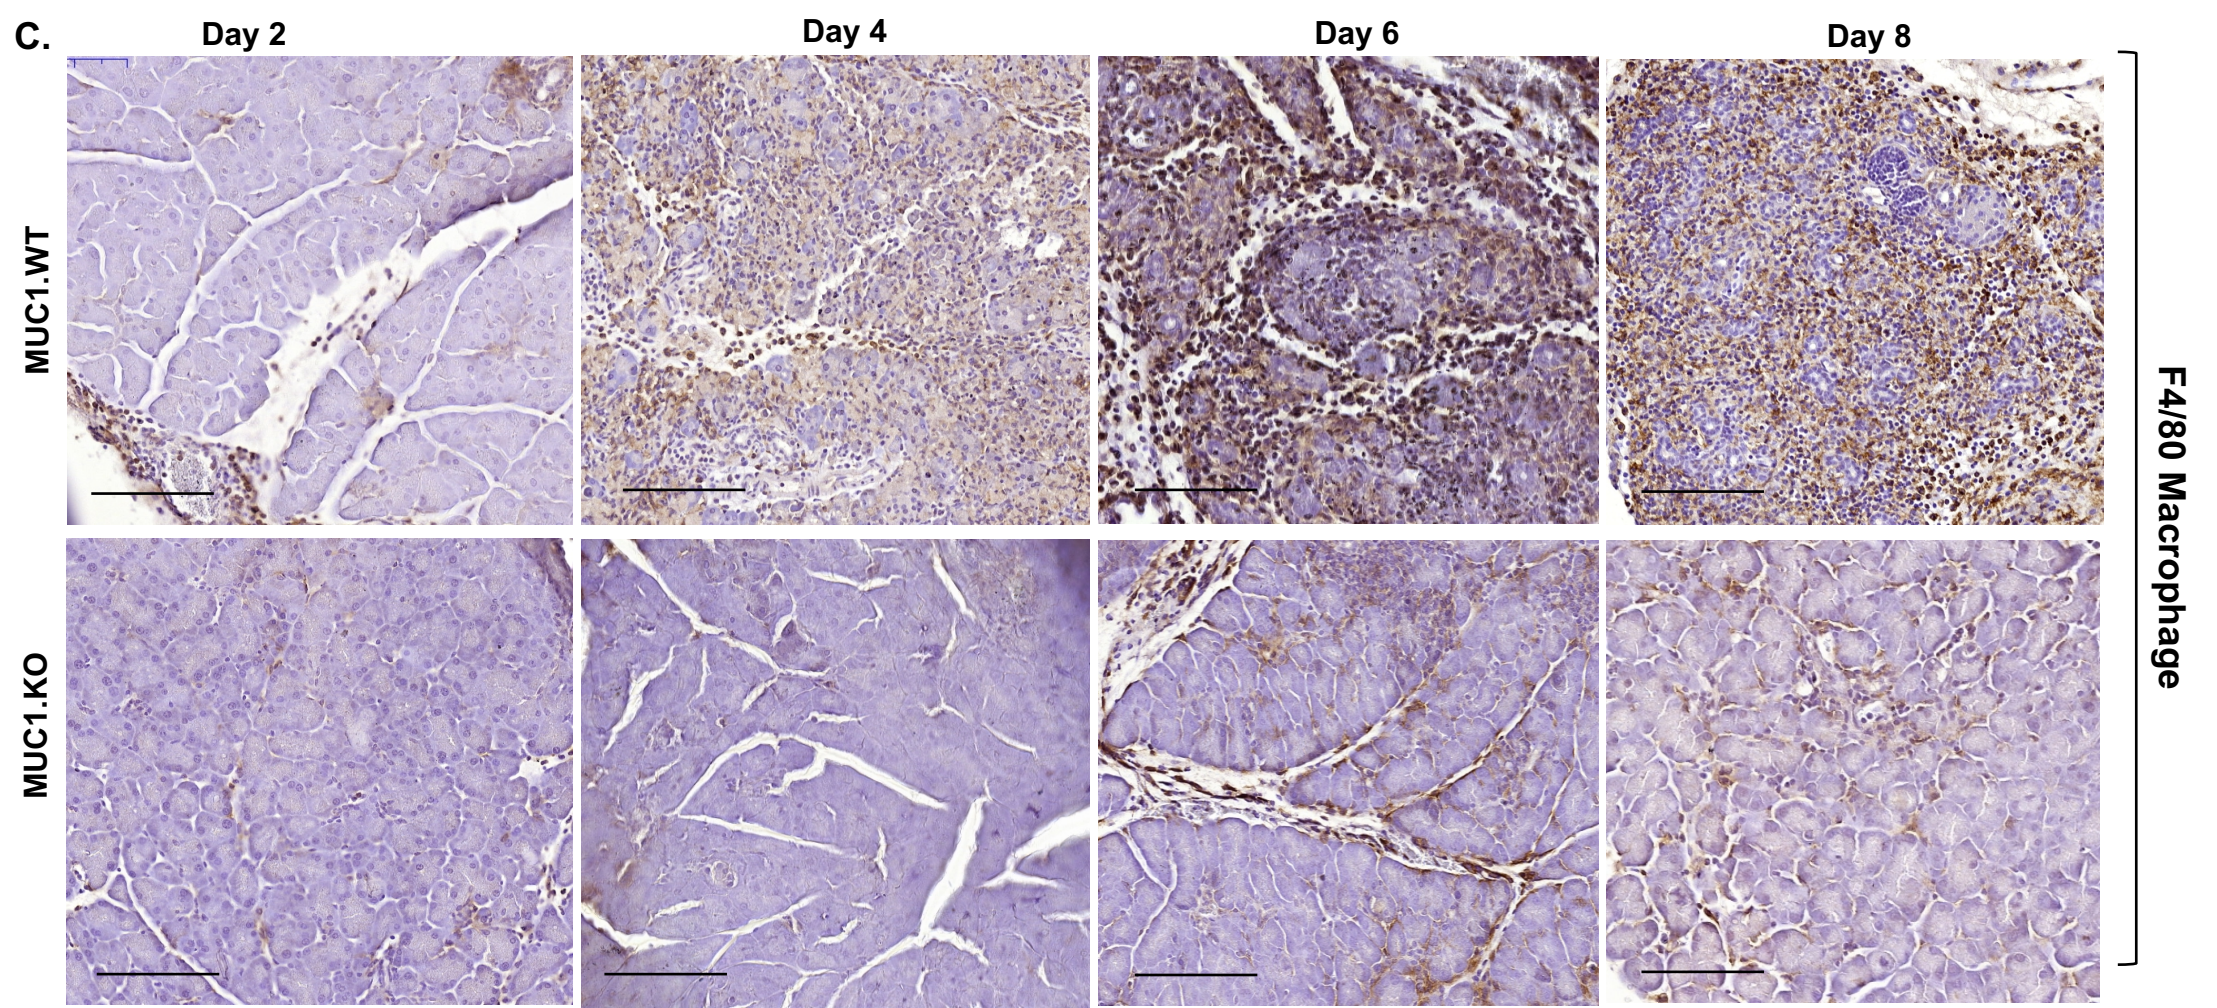

**Supplementary Figure 2.** Analysis of leukocyte infiltration in CVB3 infected WT and  $Muc1^{KO}$  mice. IHC staining of **(A)** CD45+ leukocytes, and **(C)** F4/80+ macrophages in CVB3-infected WT and  $Muc1^{KO}$  mice during the course of infection (day 2, 4, 6, and 8). Quantification of **(B)** CD45+ leukocyte infiltration, and **(D)** macrophage recruitment in the pancreas of WT and  $Muc1^{KO}$  mice with CVB3 infection on day 2, day 4, day 6 and day 8. \*  $p < 0.05$ , \*\*\*  $p \leq 0.001$ , \*\*\*\*  $p \leq 0.0001$  indicates statistical significance.

# Supplementary Figure 3.

**A.**

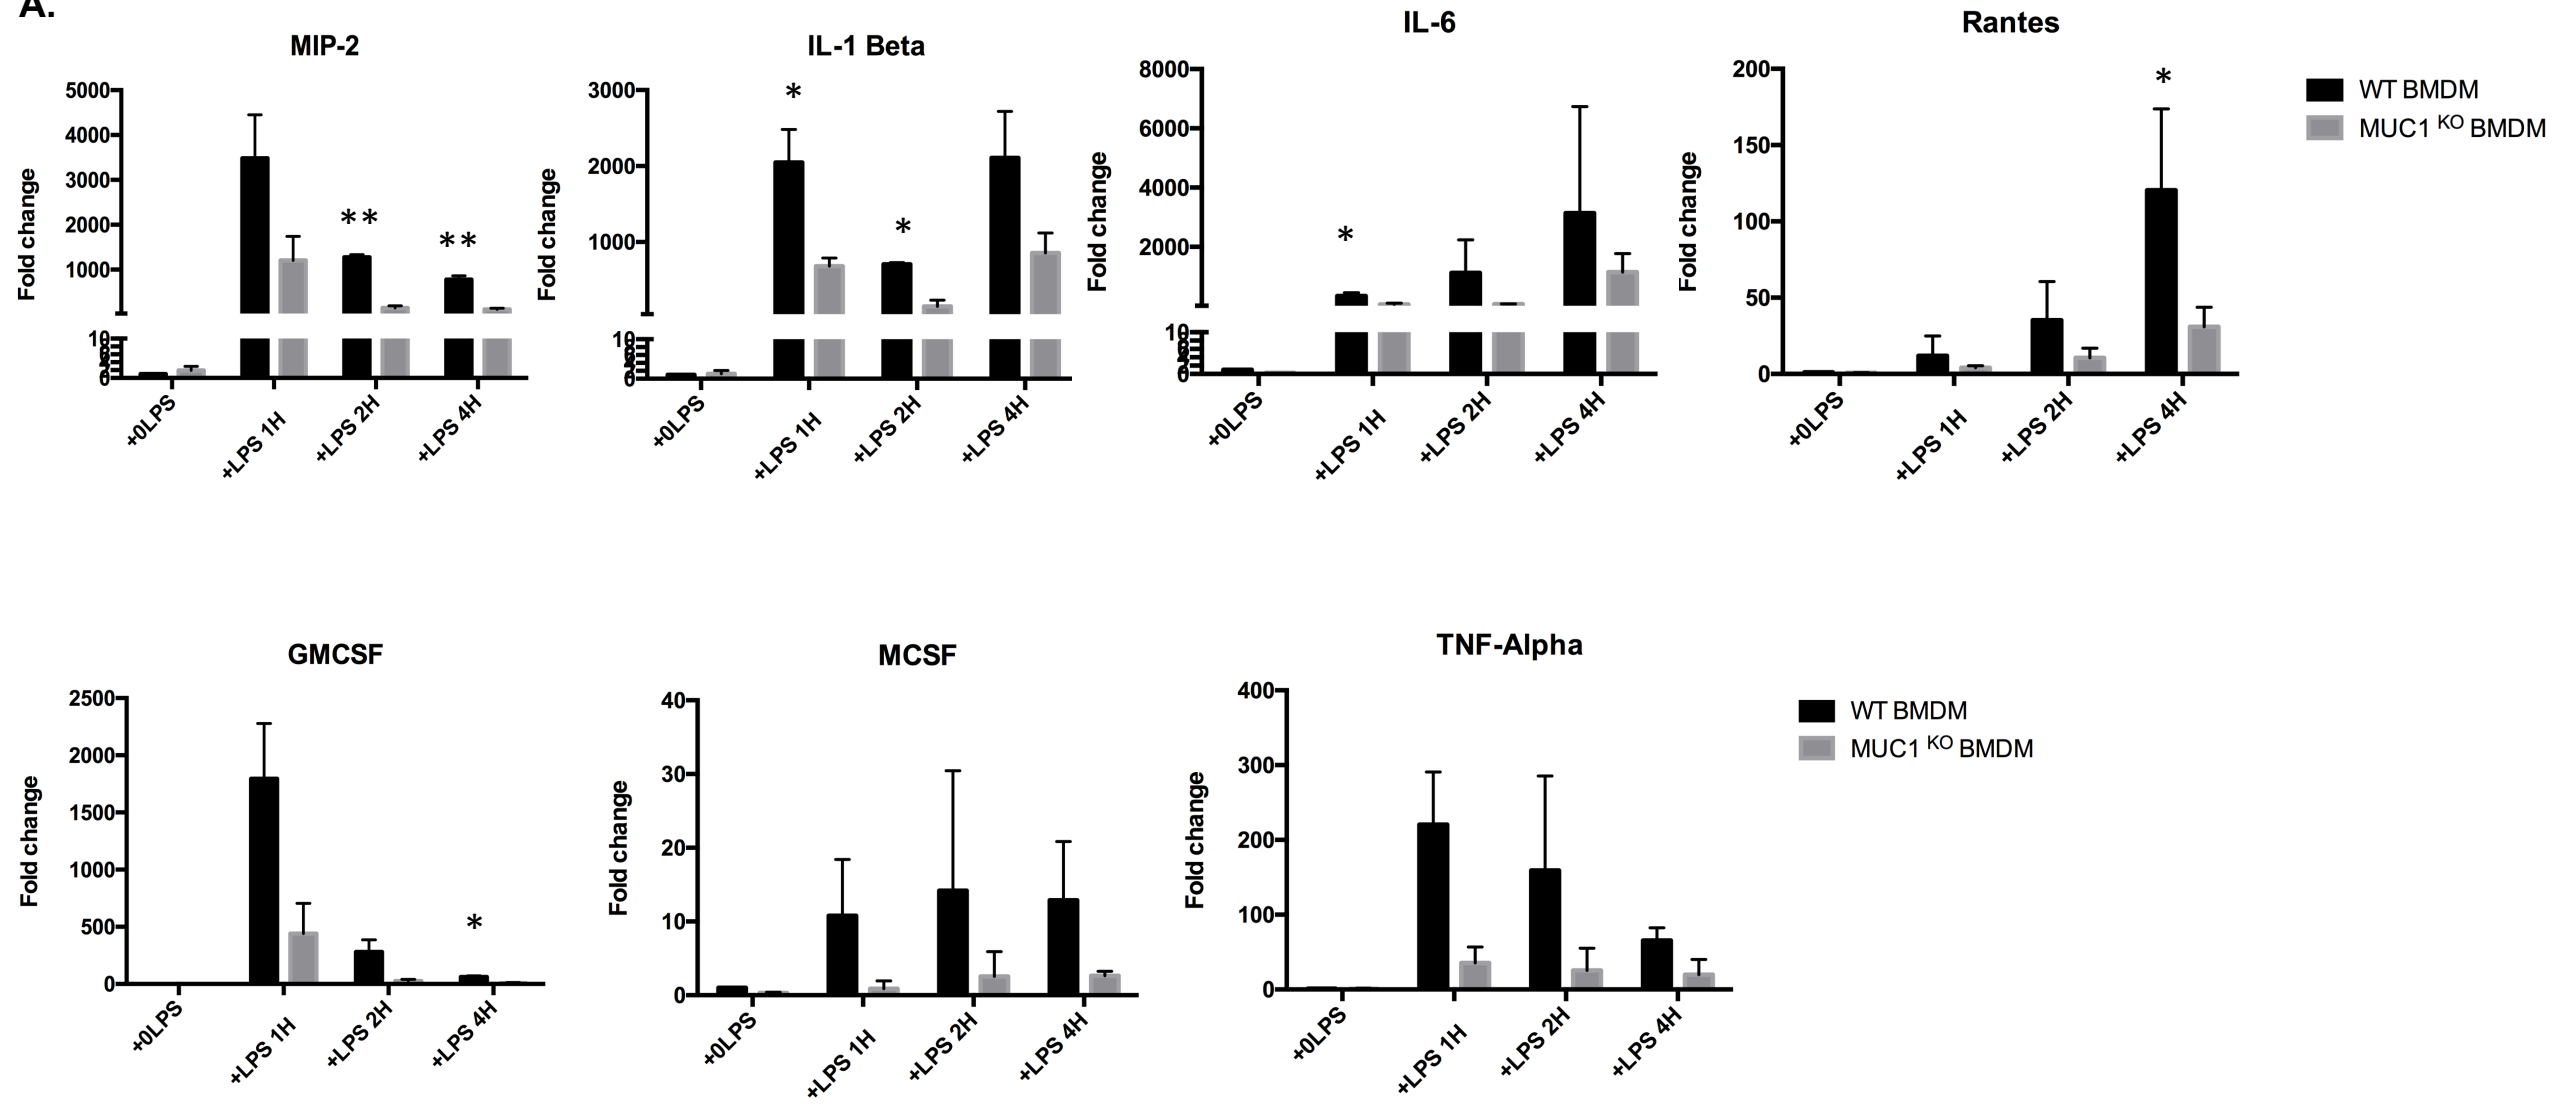

B.

Ifnar1 mRNA expression

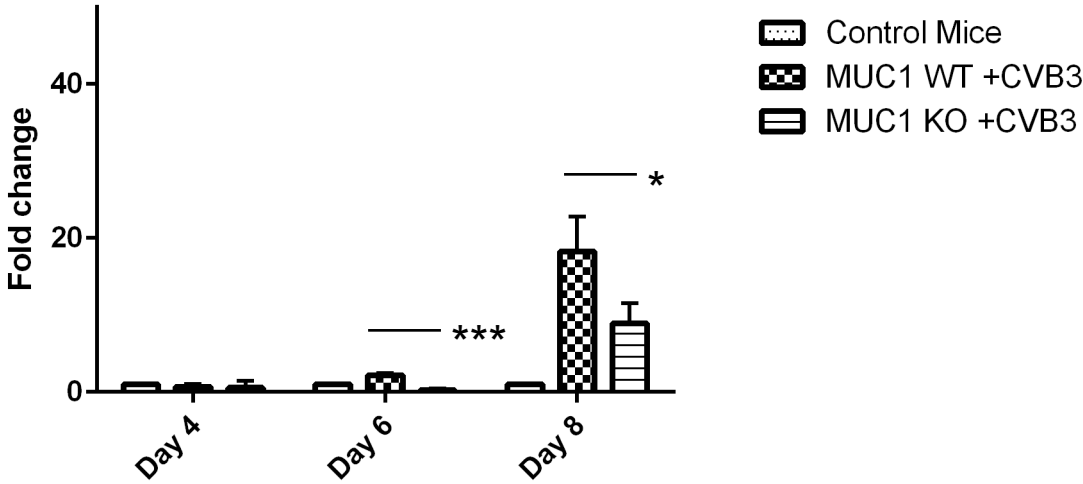

CXCL9 mRNA expression

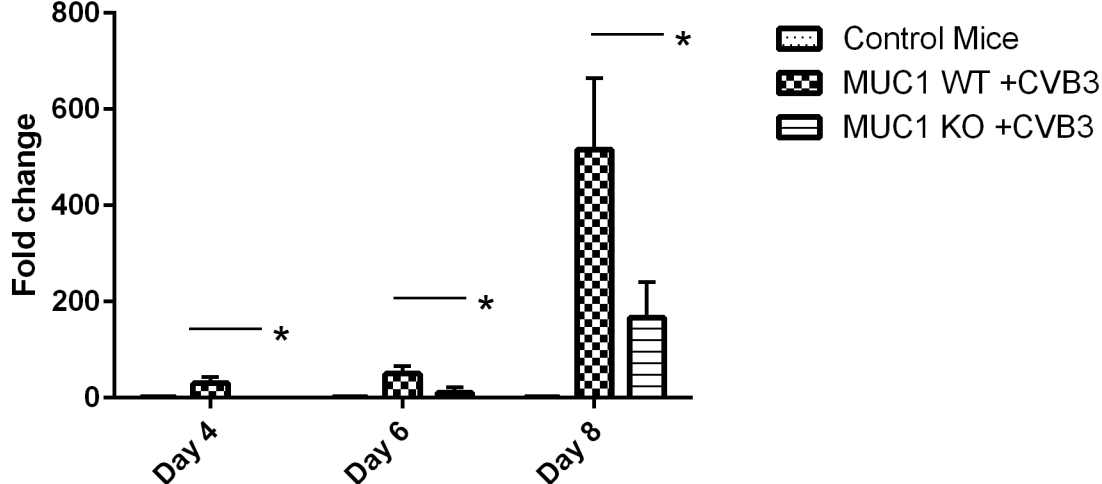

CXCL10 mRNA expression

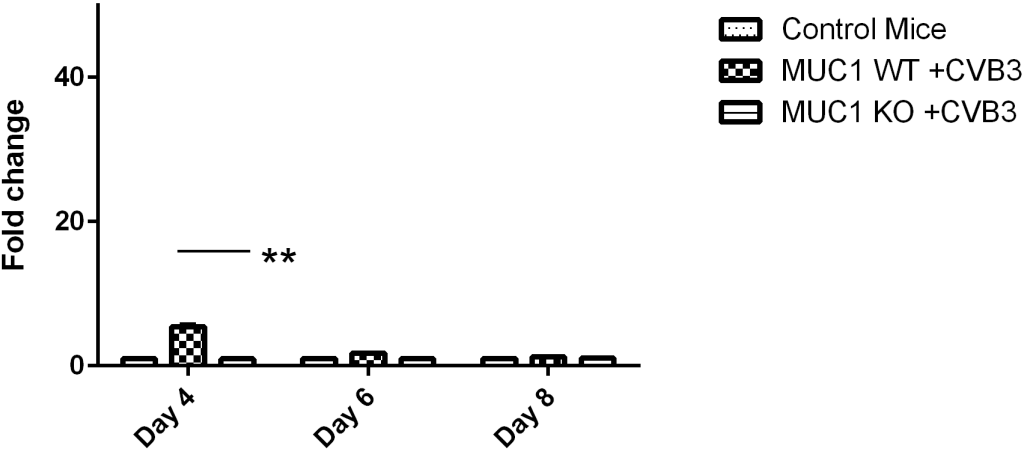

CXCL11 mRNA expression

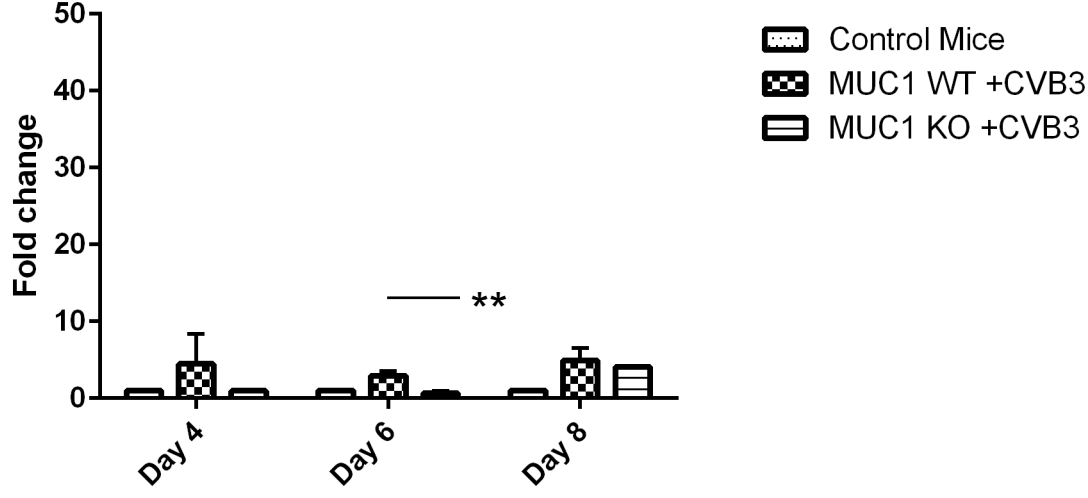

C.

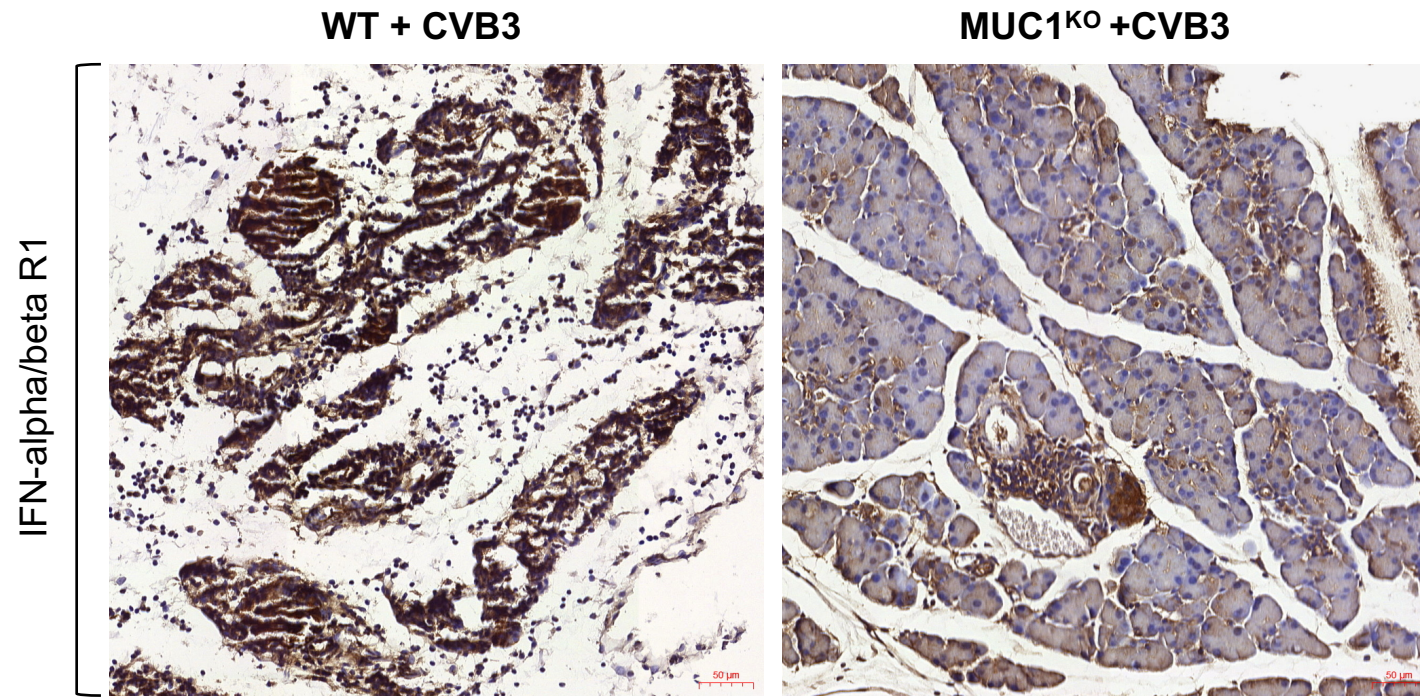

**Supplementary Figure 3.** Cytokines expression evaluation. **(A)** Cytokines in WT and Muc1<sup>KO</sup> BMDM were quantified by real-time PCR at different time point upon LPS stimulation. MIP-2: Macrophage Inflammatory protein. Quantification data shown are mean  $\pm$  SD and represent three independent experiments. \*\*  $p \leq 0.01$  indicates statistical significance. **(B)** The mRNA expression level of type1 IFNs and type1 IFN-related chemokines (CXCL9, 10, 11) were evaluated by real-time PCR in this virus model system.  $p < 0.05$ , \*\*  $p \leq 0.01$ , \*\*\*  $p \leq 0.001$  indicates statistical significance. **(C)** IHC for type1 IFNs on sections from WT control and Muc1<sup>KO</sup> mice with CVB3 infection 8-days post-Inoculation. Scale bar 50  $\mu$ m.
